# Supplementary material for: Adaptation, chance, and history in experimental evolution reversals to unicellularity
Source: PubMed Central journal article supplement — Evolution. 2018 Dec 14;73(1):73–83. doi: 10.1111/evo.13654 (PMC6590667; doi:10.1111/evo.13654), 2018-12-14

# Multicellularity offers protection against UV

**A.**

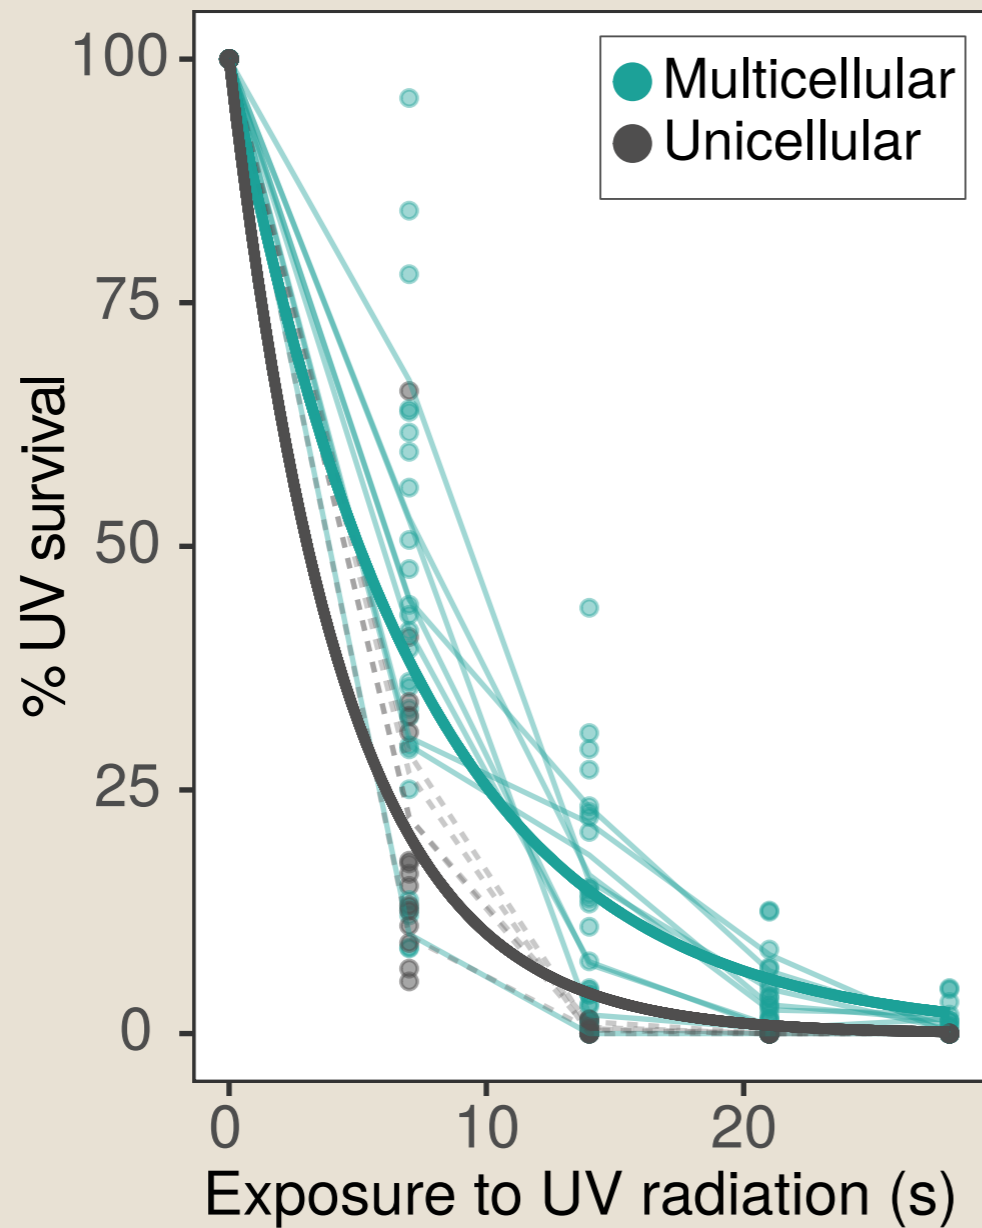

**B.**

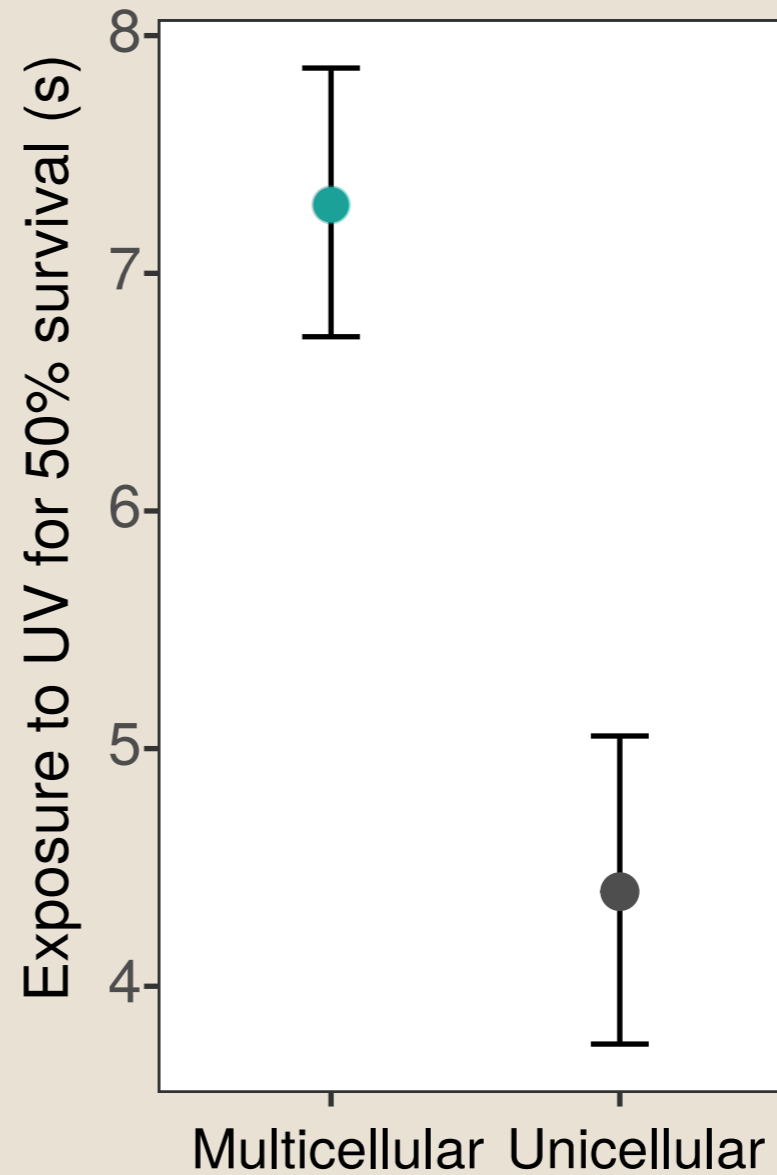

# But local competition is a major constraint on multicellularity in spatially structured environments

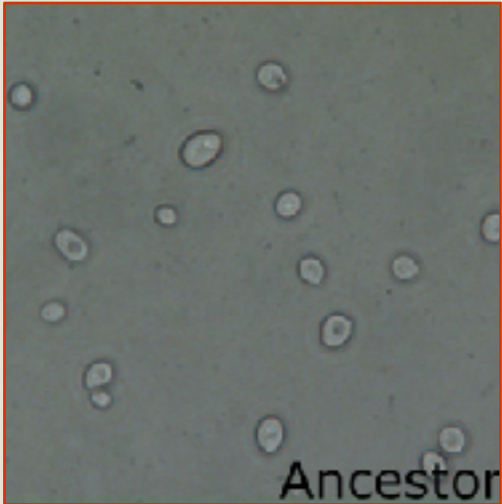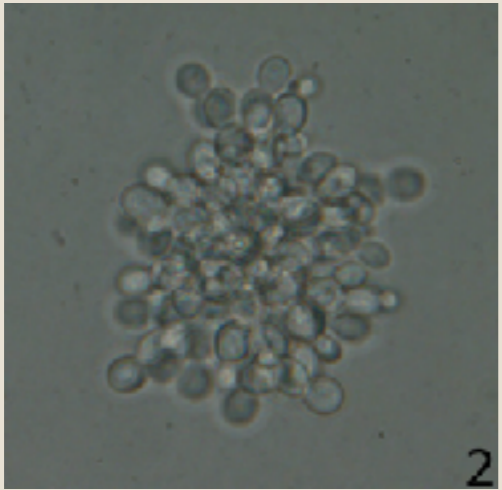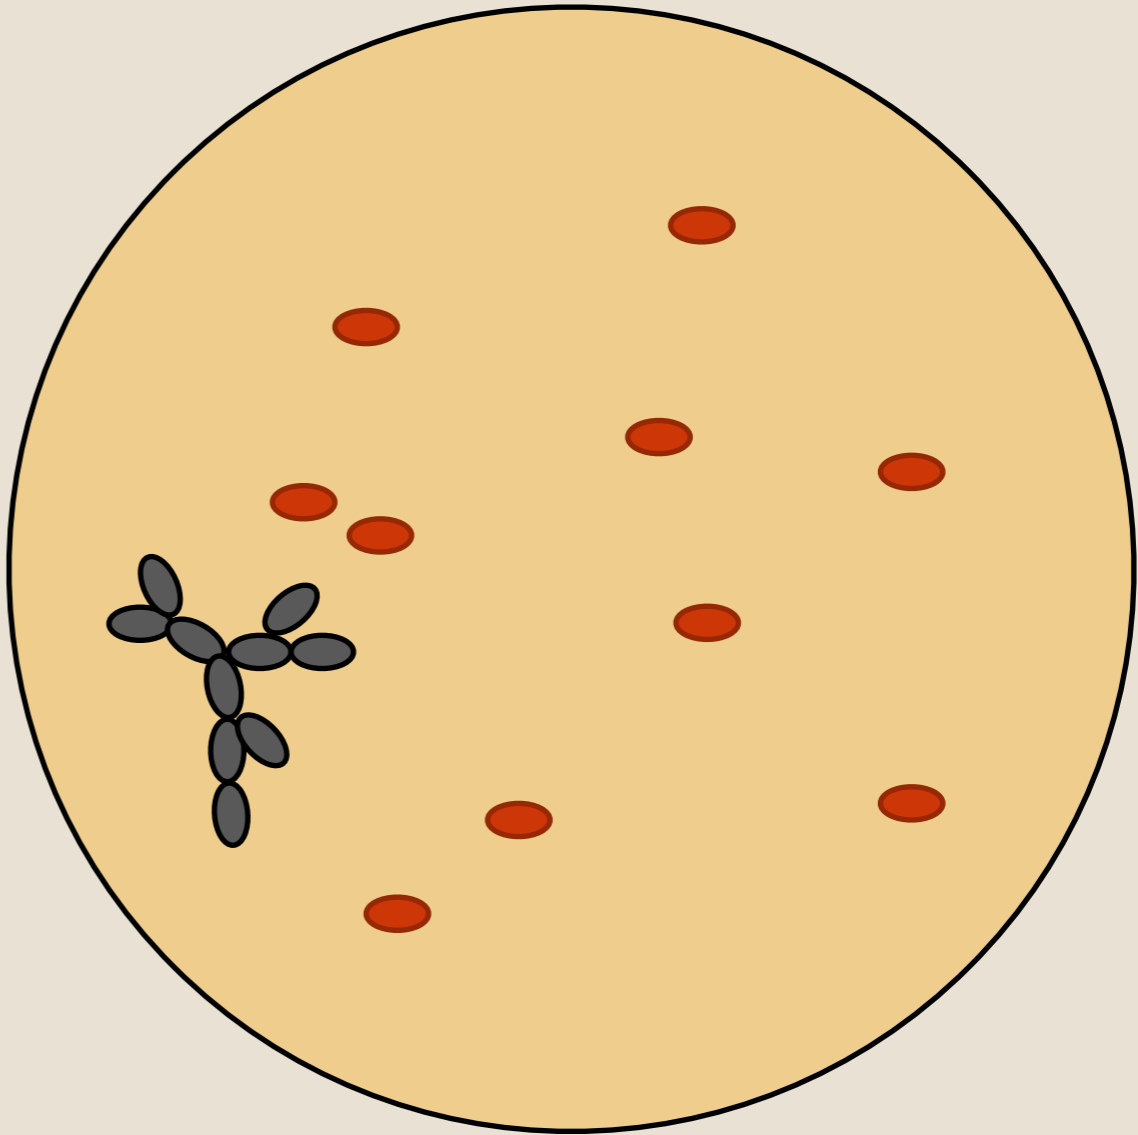

# Using a system that recently evolved multicellularity

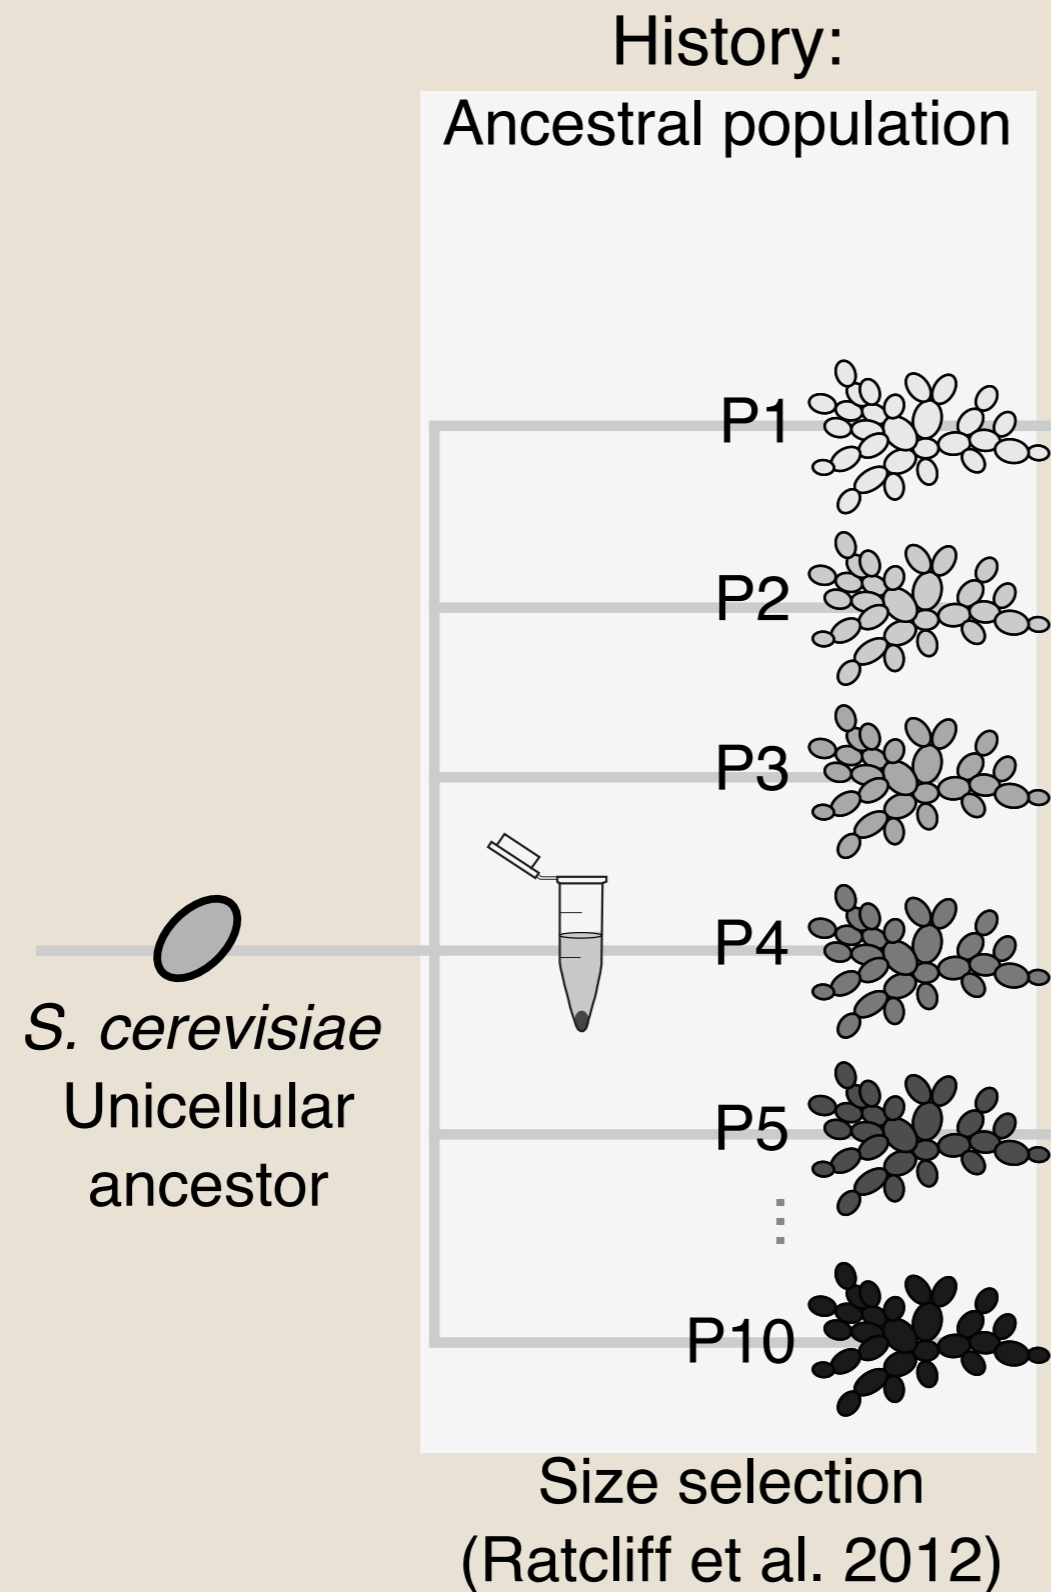

# We can address the relative roles of history, adaptation, and chance.

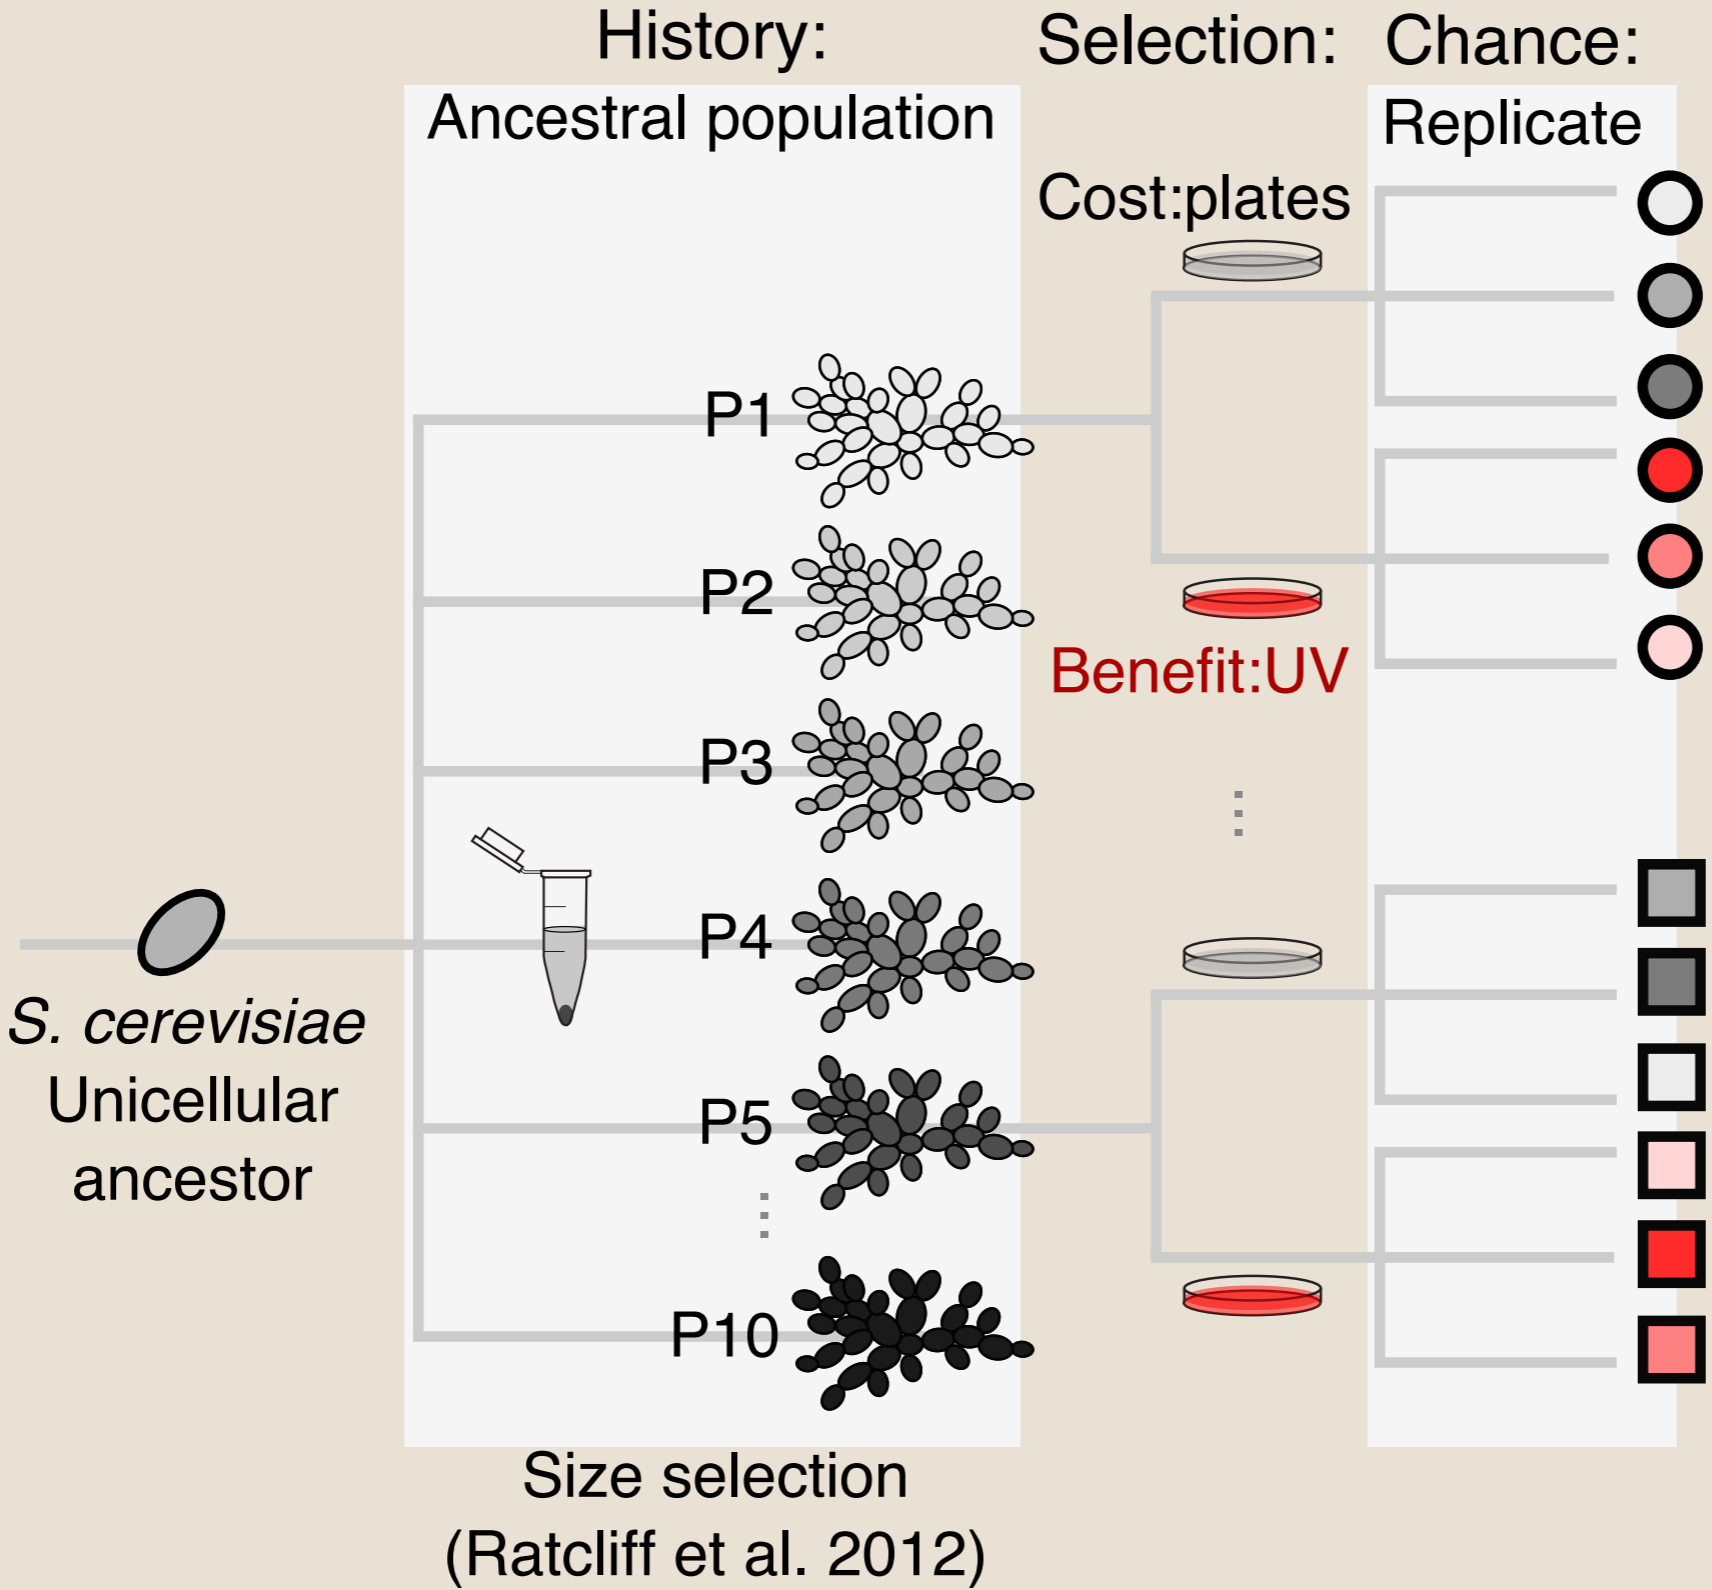

# Multicellularity rapidly reverts in structured environments.

Ancestral  
Pop. 1

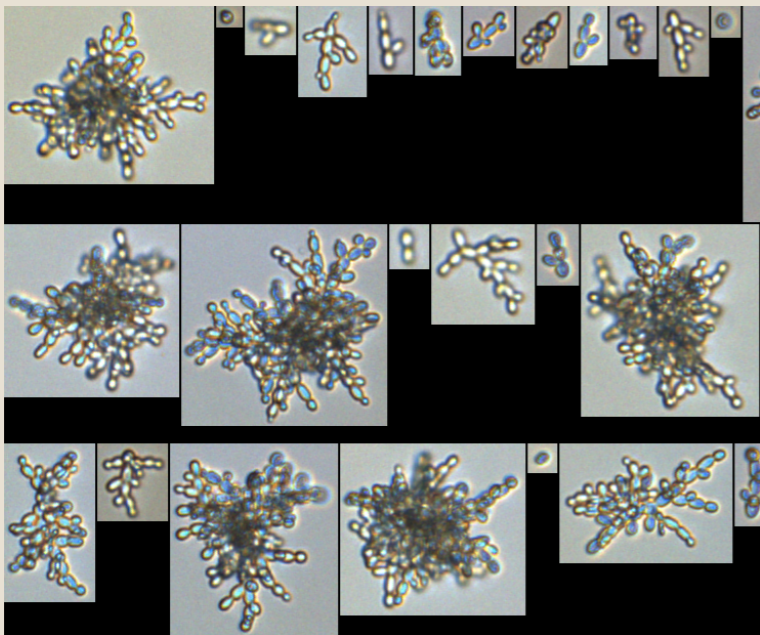

Ancestral  
Pop. 4

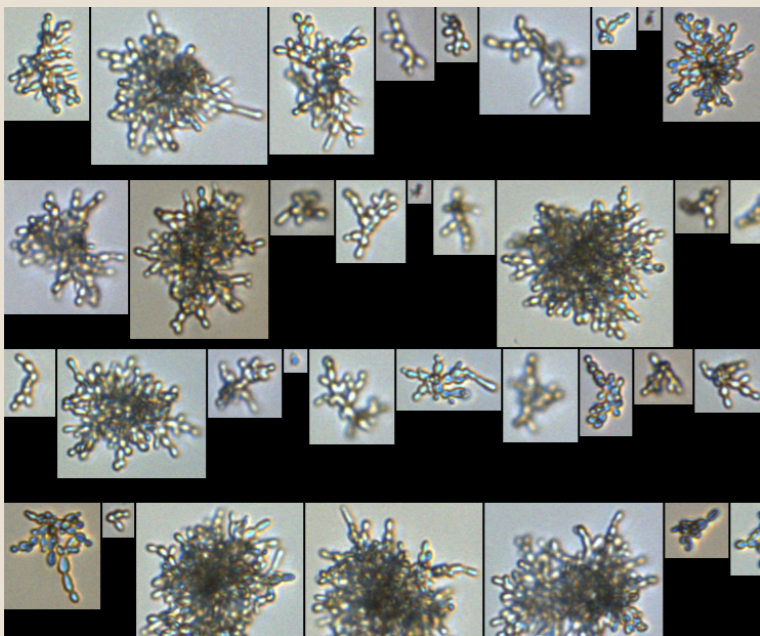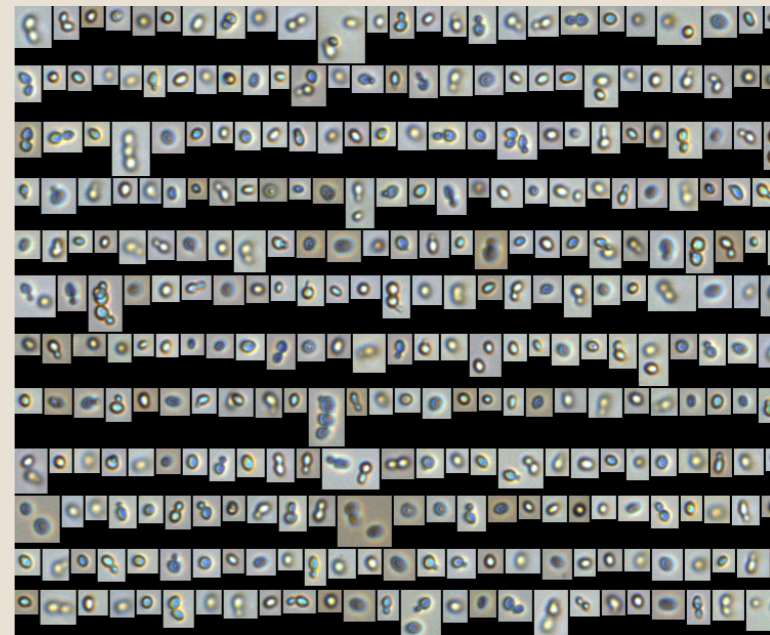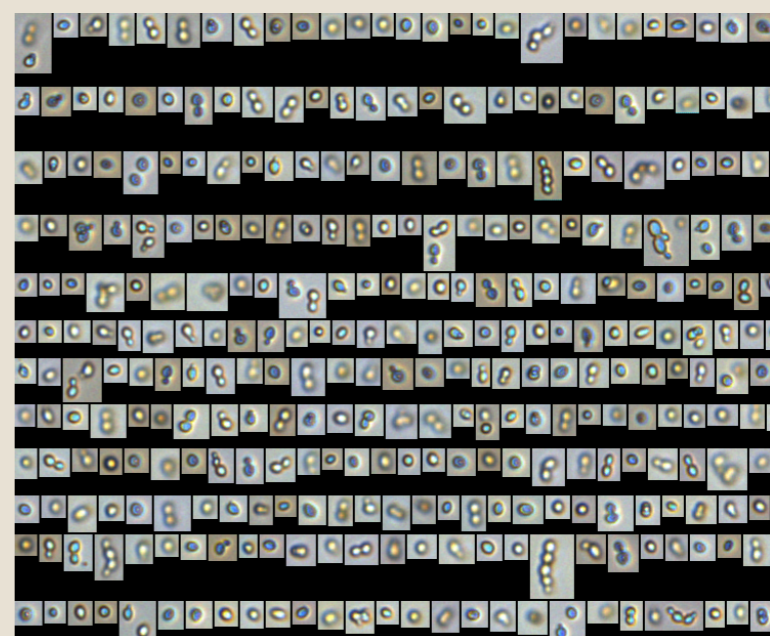



# But rate and pattern depend on previous history

Ancestral  
Pop. 1

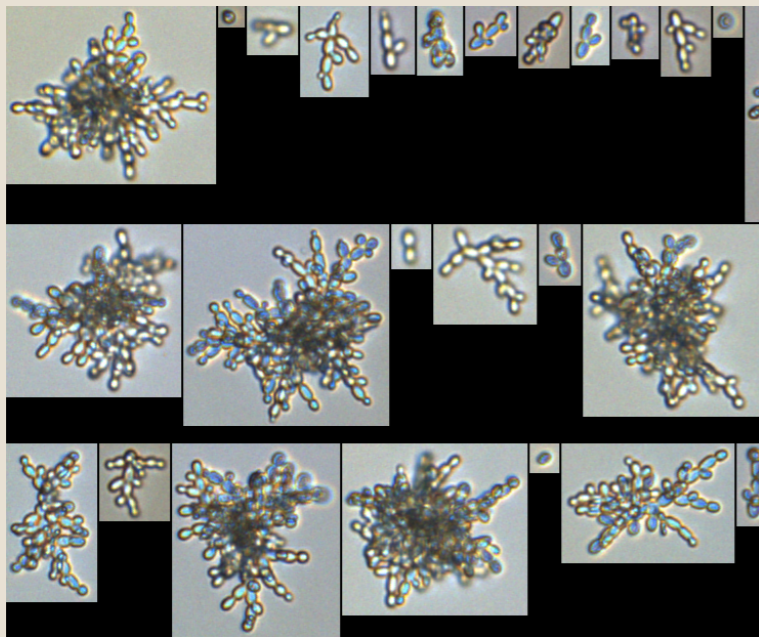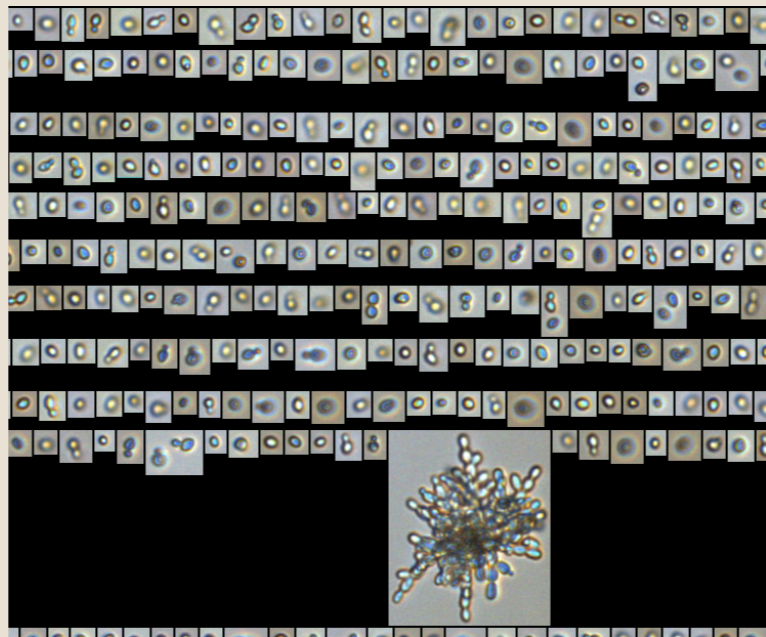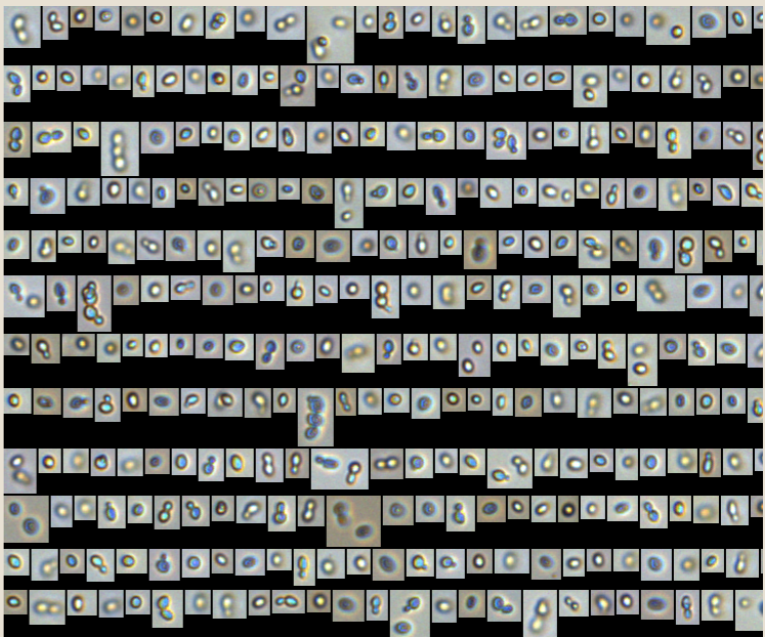

Ancestral  
Pop. 4

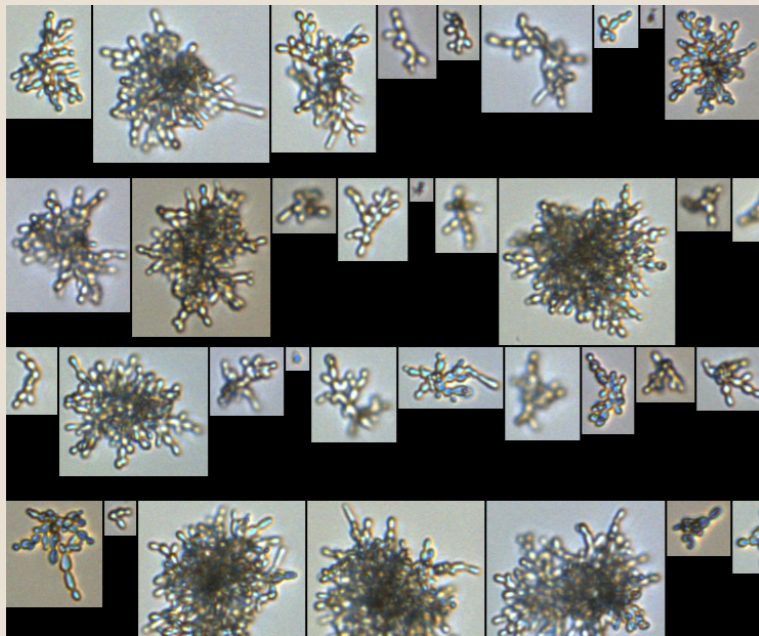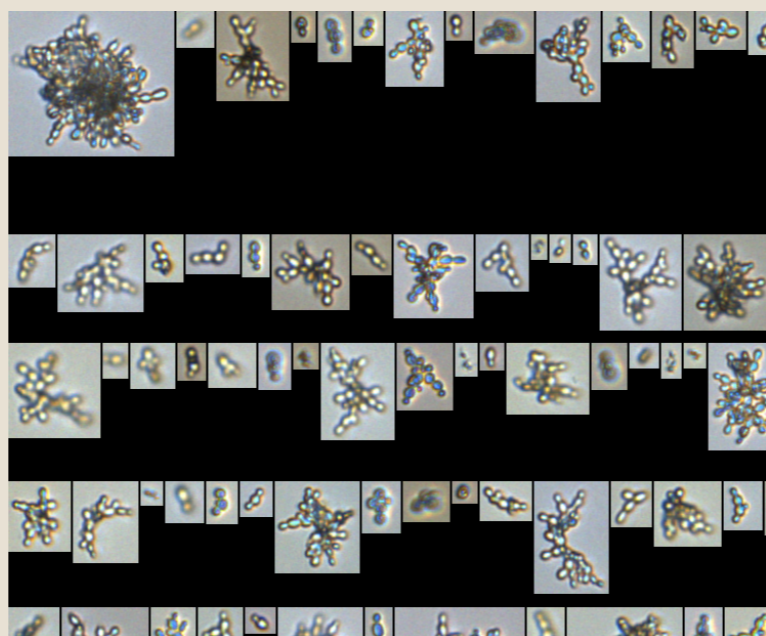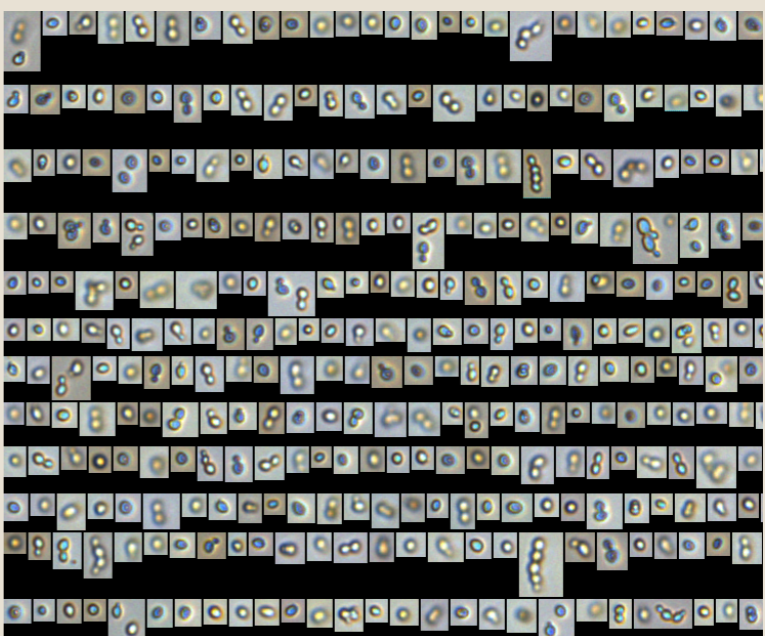

# But rate and pattern depend on previous history

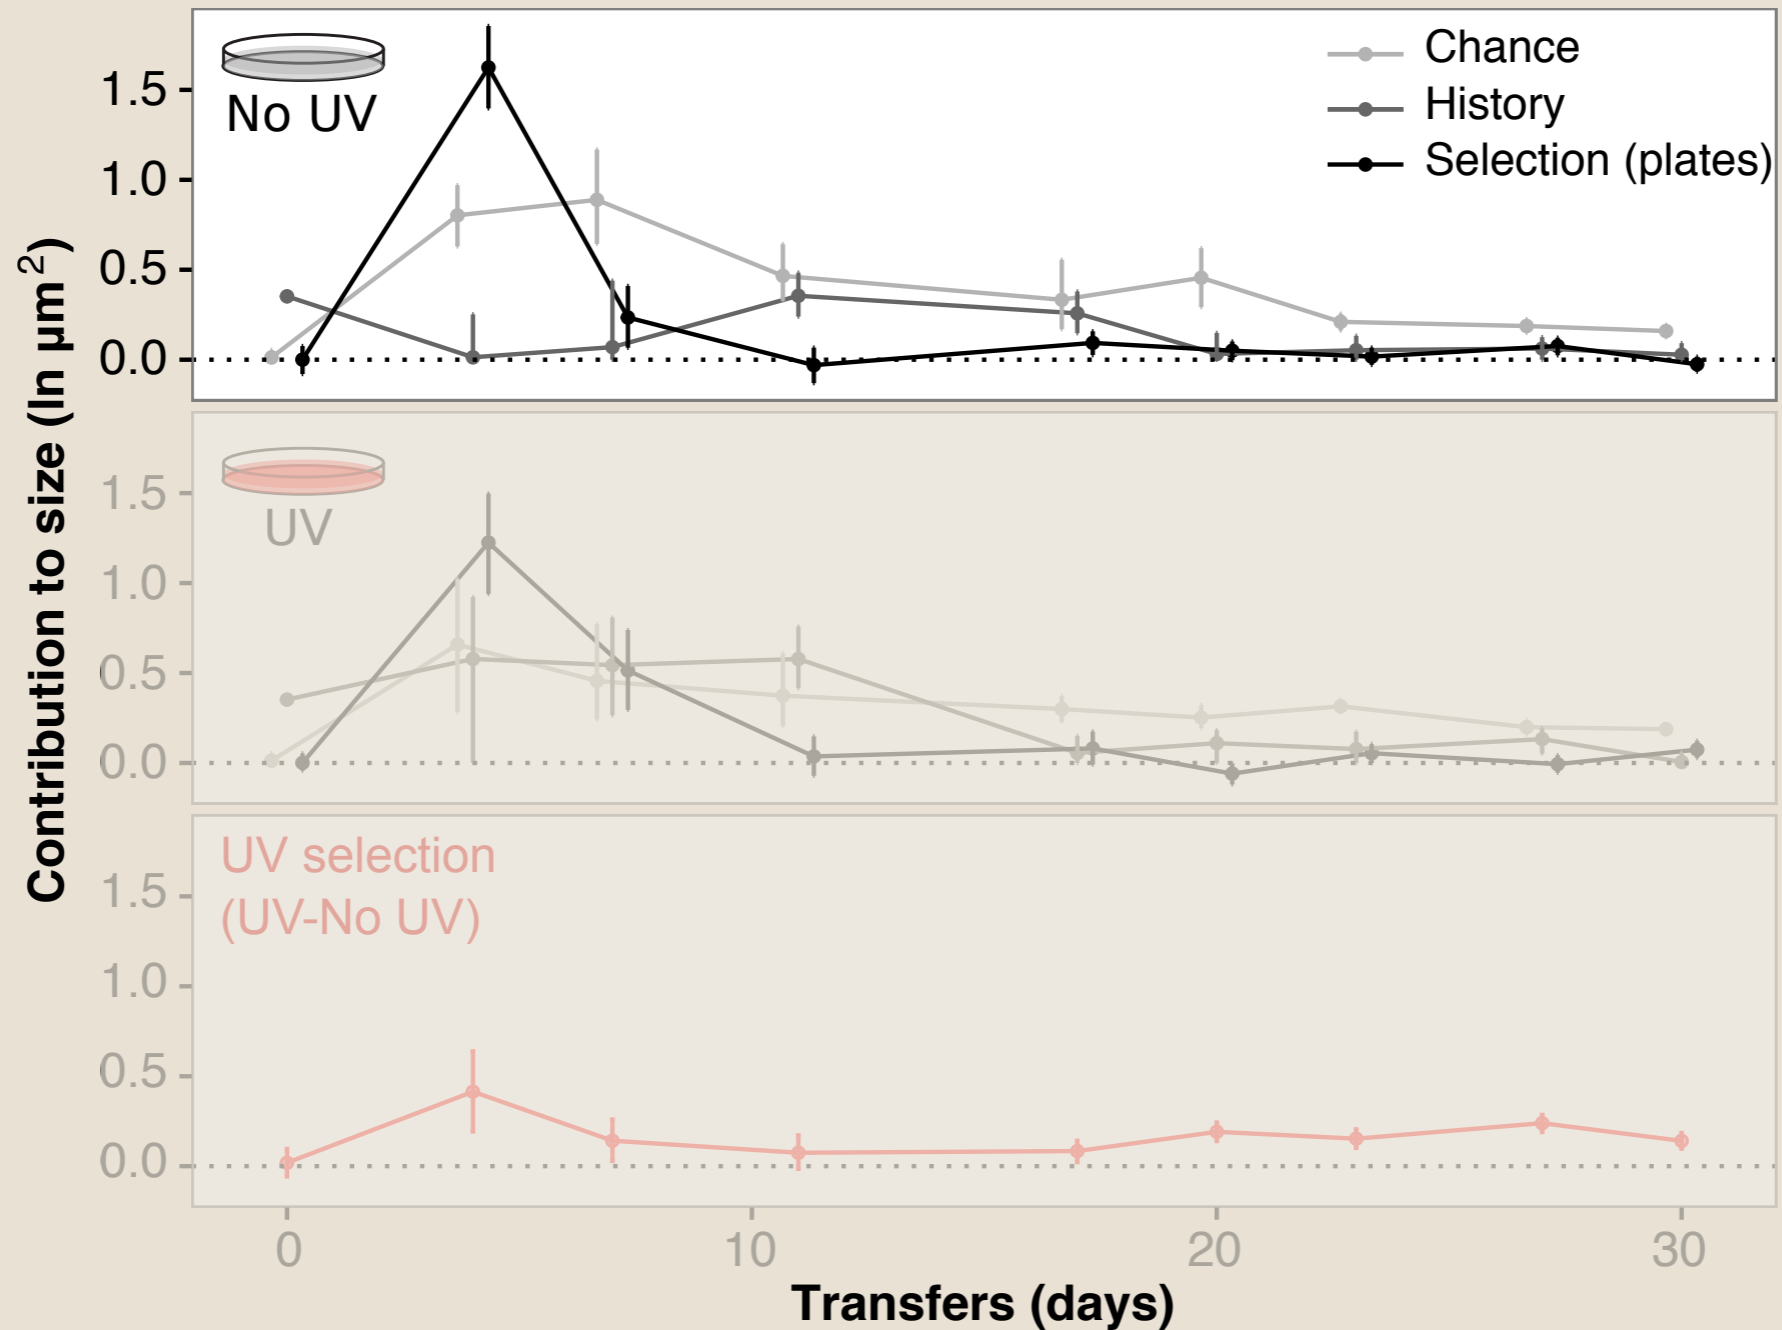

# But rate and pattern depend on previous history

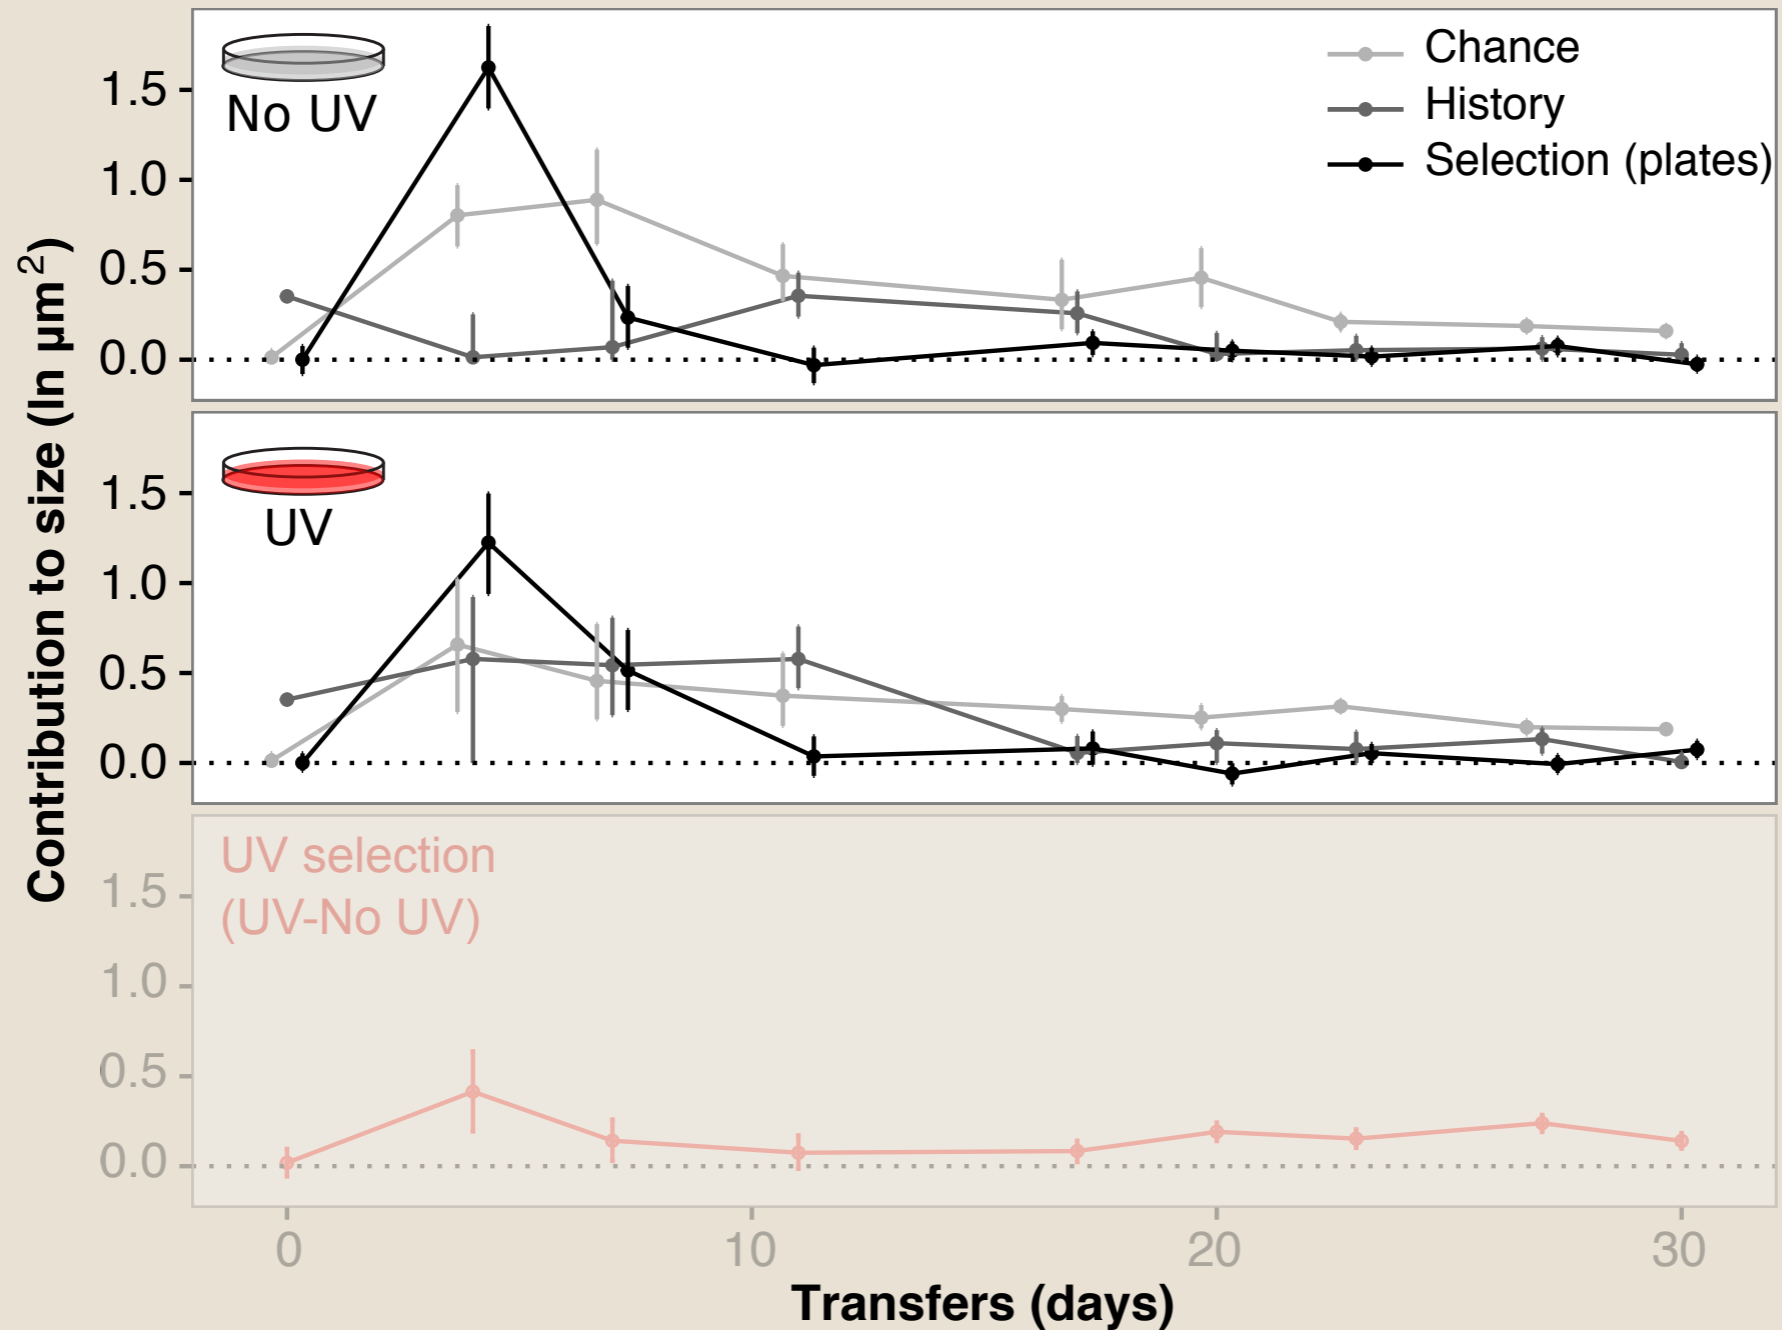



# But rate and pattern depend on previous history

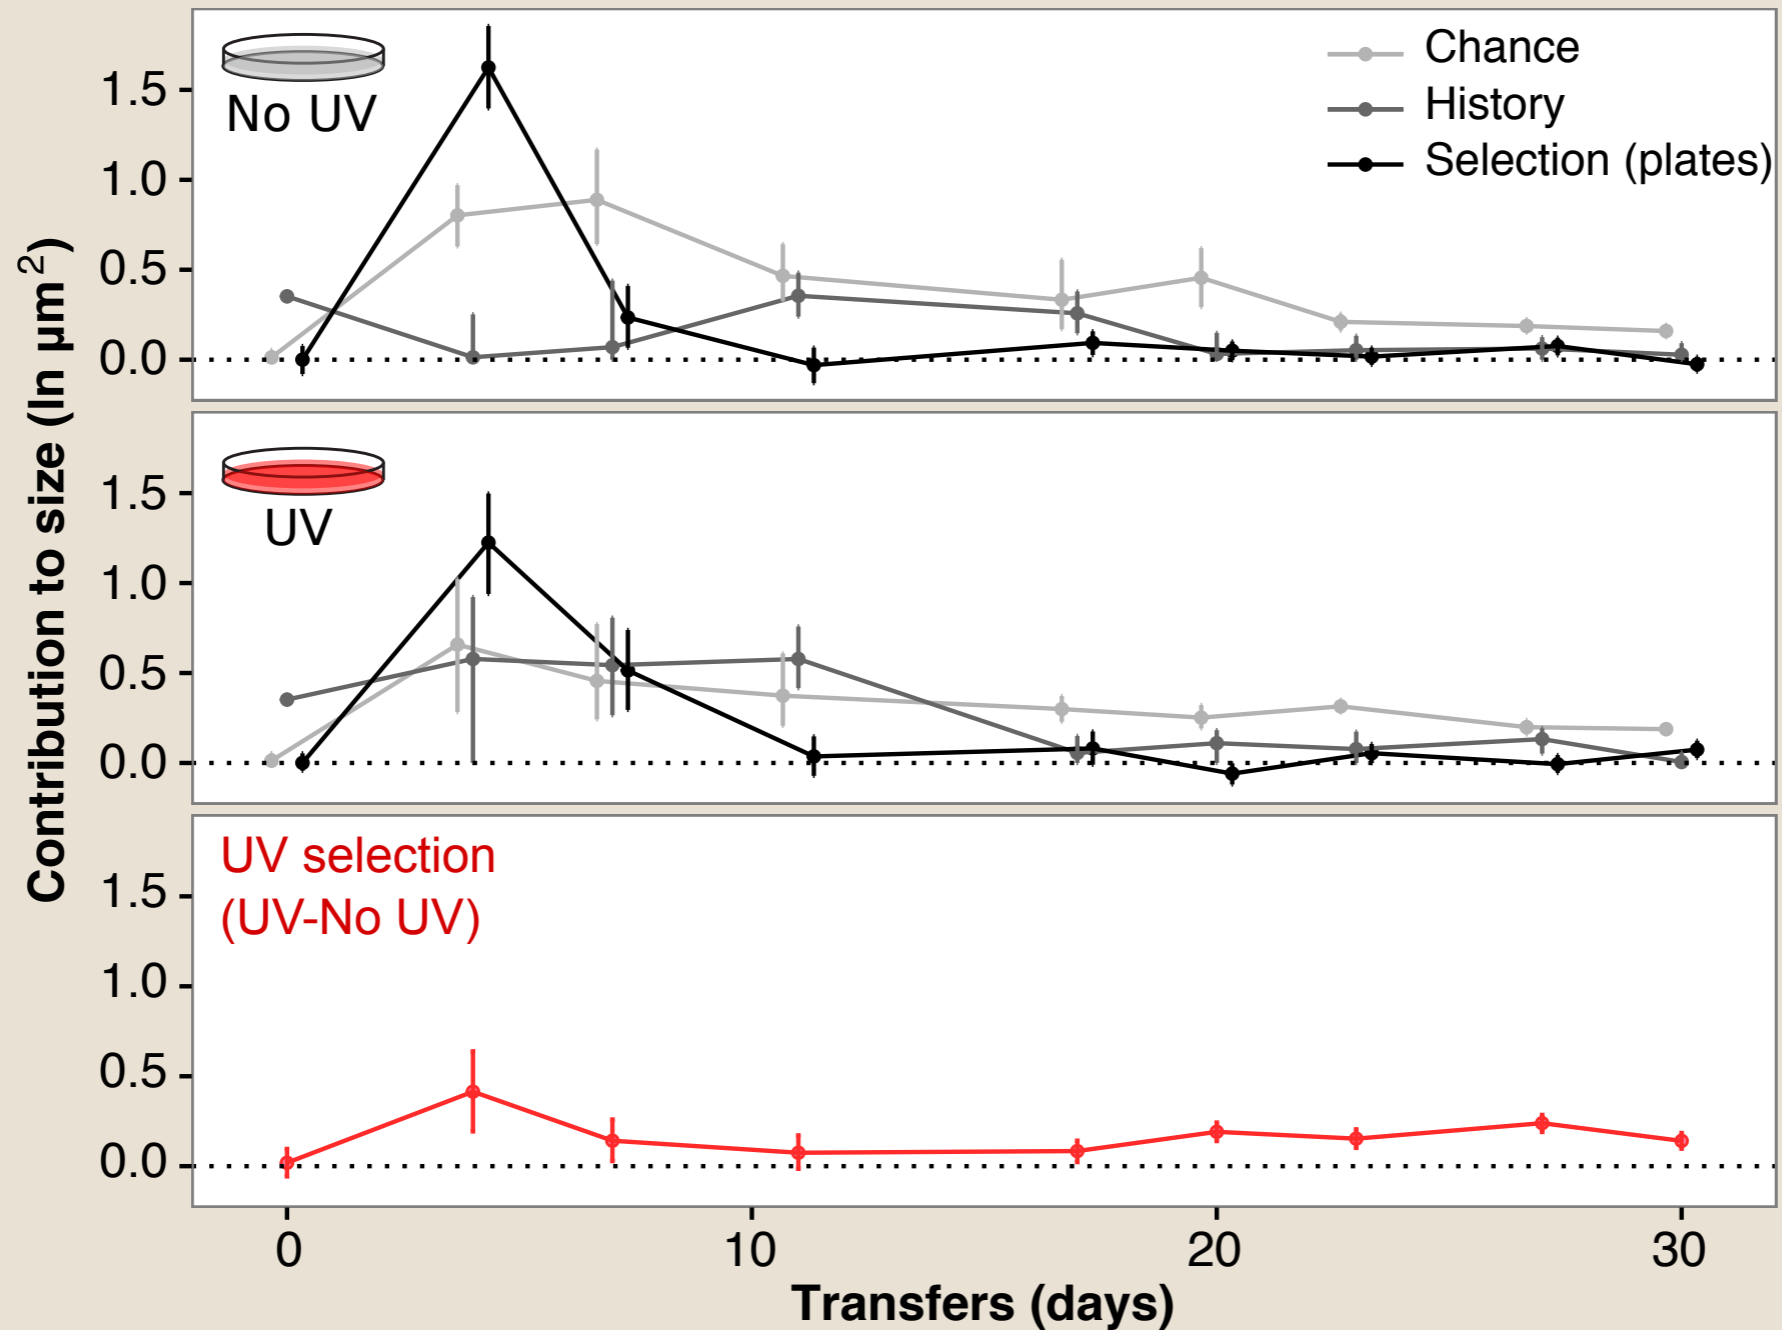

Supplement: EVO-73-73-s002.pdf [file EVO-73-73-s002.pdf]
